# Supplementary material
Source: PubMed Central journal article supplement (PMC7400196)
Supplement: jamapediatr-e202282-s002.pdf [file jamapediatr-e202282-s002.pdf]

## Data Sharing Statement

Sondhi. Efficacy of Ketogenic Diet, Modified Atkins Diet, and Low Glycemic Index Therapy Diet Among Children With Drug-Resistant Epilepsy. *JAMA Pediatr*. Published August 03, 2020.  
10.1001/jamapediatrics.2020.2282

### Data

**Data available:** Yes

**Data types:** Deidentified participant data

### How to access

**data:** <https://data.mendeley.com/datasets/sd4ct72s6s/draft?a=bc90fab1-fd12-4524-a062-30a5e7499d86>

**When available:** With publication

### Supporting Documents

**Document types:** None

### Additional Information

**Who can access the data:** researchers whose proposed use of the data has been approved

**Types of analyses:** For any purpose

**Mechanisms of data availability:** after approval of a proposal

**Any additional restrictions:** Nil
